# Supplementary material
Source: MDPI journal article supplement (https://www.mdpi.com/2073-4395/12/2/250)
Supplement: s1 [file s1]

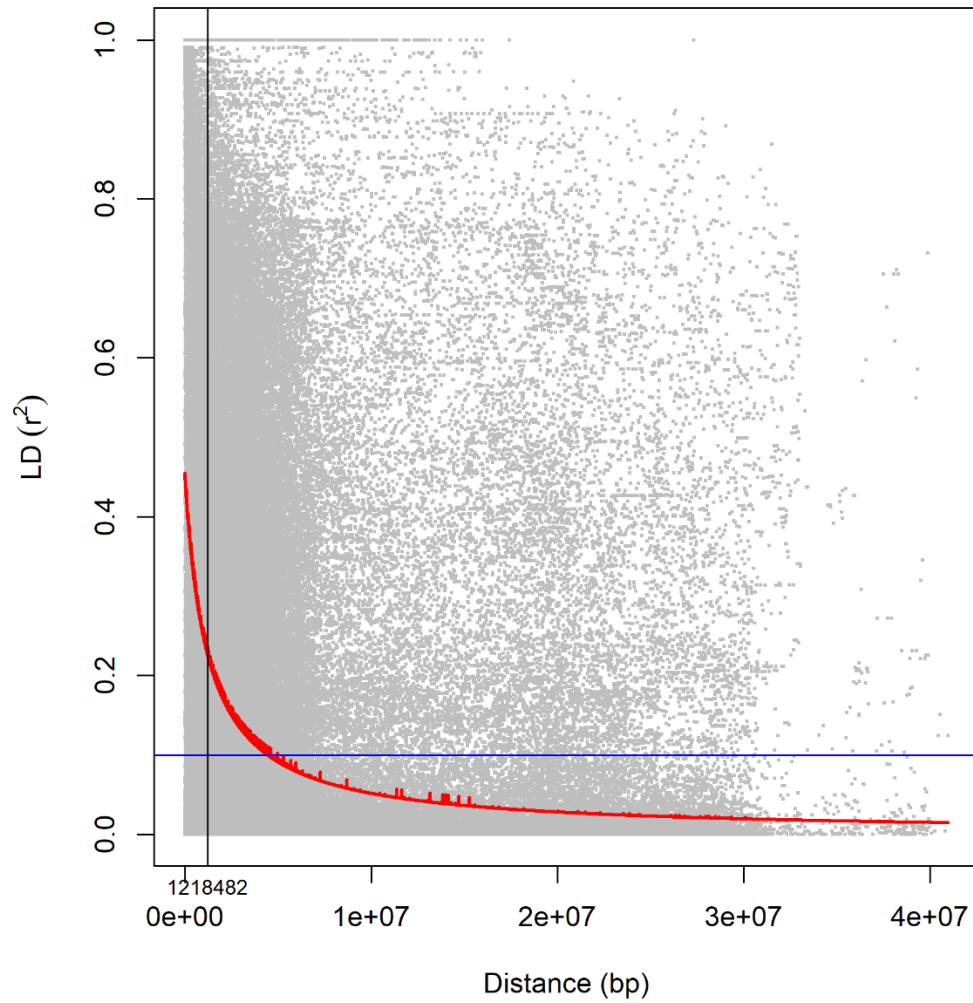

**Supplementary figure S1. The mean level of linkage disequilibrium in 470 BLG accessions.** The mean linkage disequilibrium (LD) was estimated using all pairs of loci located in a window of 100 SNPs. The X-axis indicates the distance between marker pairs and the Y-axis indicates LD level. The red line denotes mean  $r^2$ , and the black line represents the half of maximum value.

**Supplementary table S1.** Hundred seed weight and missense mutation from GRIN database and publicly available genome sequences.

| GRIN accession | Seed weight | Missense mutation <sup>1</sup> | Type     |
|----------------|-------------|--------------------------------|----------|
| PI372418       | 12.9        | G110S                          | cultivar |
| PI404198B      | 8.5         | G110S                          | cultivar |
| PI437321       | 8.7         | G110S                          | cultivar |
| PI437485       | 14.1        | G110S                          | cultivar |
| PI437654       | 10.1        | G110S                          | cultivar |
| PI437655       | 11.7        | G110S                          | cultivar |
| PI437690       | 7.5         | G110S                          | cultivar |
| PI437793       | 14.6        | G110S                          | cultivar |
| PI437944       | 8.4         | G110S                          | cultivar |
| PI438309       | 9.6         | G110S                          | cultivar |
| PI506862       | 15.0        | G110S                          | cultivar |
| PI548316       | 15.6        | G110S                          | cultivar |
| PI548402       | 7.8         | G110S                          | cultivar |
| PI567230       | 4.8         | G110S                          | cultivar |
| PI567298       | 8.9         | G110S                          | cultivar |
| PI567307       | 6.7         | G110S                          | cultivar |
| PI567346       | 8.0         | G110S                          | cultivar |
| PI567353       | 10.5        | G110S                          | cultivar |
| PI567361       | 10.8        | G110S                          | cultivar |
| PI567407       | 6.1         | G110S                          | cultivar |
| PI567416       | 10.4        | G110S                          | cultivar |
| PI567426       | 13.4        | G110S                          | cultivar |
| PI567428       | 7.7         | G110S                          | cultivar |
| PI567439       | 12.4        | G110S                          | cultivar |
| PI597476       | 12.8        | G110S                          | cultivar |
| PI567336B      | 4.6         | G110S                          | landrace |
| PI567352A      | 10.6        | G110S                          | landrace |
| PI567410B      | 15.0        | G110S                          | landrace |
| PI567516C      | 4.4         | G110S                          | landrace |
| PI587588A      | 10.3        | G110S                          | landrace |
| PI587804       | 9.9         | G110S                          | landrace |
| PI592937       | 12.2        | G110S                          | landrace |
| PI594880       | 8.5         | G110S                          | landrace |
| PI597478B      | 12.0        | G110S                          | landrace |
| PI602991       | 15.1        | G110S                          | landrace |
| PI603420       | 6.6         | G110S                          | landrace |
| PI603488       | 12.1        | G110S                          | landrace |
| PI603495B      | 12.8        | G110S                          | landrace |
| PI603555       | 16.5        | G110S                          | landrace |
| PI603556       | 10.0        | G110S                          | landrace |

|           |      |       |          |
|-----------|------|-------|----------|
| PI062203  | 10.2 | G110S | landrace |
| PI089772  | 9.6  | G110S | landrace |
| PI090479P | 13.9 | G110S | landrace |
| PI090763  | 9.8  | G110S | landrace |
| PI416890  | 17.6 | A105T | cultivar |

<sup>1</sup> G110S and A105T indicates the Williams 82 reference genome for *Glyma.02G119600*.
